# Supplementary material for: Volatile aromatic substances analysis of different temperature stored ‘Docteur Jules Guyot’ pear (Pyrus communis L.)
Source: Front Plant Sci. 2025 Apr 10;16:1572093. doi: 10.3389/fpls.2025.1572093 (PMC12018334; doi:10.3389/fpls.2025.1572093)
Supplement: Supplementary Table 2 — Overview of the GC–MS results. [file Table2.xlsx]

## Sheet: Sheet1
				RT																			LT
				0d			4d			8d			10d			12d			14d				LT4d			LT8d			LT10			LT10R2			LT10R4
Alcohols	CAS	RT(min)	SI	A	B	C	A	B	C	A	B	C	A	B	C	A	B	C	A	B	C		A	B	C	A	B	C	A	B	C	A	B	C	A	B	C
Ethanol	64-17-5	7.894	99																19.9493	30.6732	37.293
1-Pentanol	71-41-0	19.959	92	2.56524			2.68583	3.71057	4.1748			3.76523		4.48878				6.17761	5.8416	4.78168				6.39255								6.96826	5.64991	6.39752			6.04489
1-Butanol	71-36-3	15.801	98										47.0496	23.326		73.2038	88.6164															119.791	111.941	109.044	177	207.197	161.359
1-Propanol, 2,2-dimethyl-	75-84-3	32.035	69																												3.74994
Linalool	78-70-6	31.033	96	1.56801	3.50436	1.10235	1.17455	1.28642	4.36459	2.93721	3.0556	4.55074	6.45267	6.09303	2.23737	17.1132	16.0786		14.5488		21.8556		7.98628	8.1163	8.66717	8.02247	3.86097	5.576	1.96871	2.77536	6.1015	6.58783	5.65718	4.34377	10.8079
1-Propanol, 2-methyl-	78-83-1	13.038	91																																53.6303	49.1476
dl-Menthol	89-78-1	33.75	87																															2.65482
.alpha.-Terpineol	98-55-5	35.233	93
1-Hexanol, 2-ethyl-	104-76-7	29.256	96	3.28356	3.67727	1.14044	4.08947	4.81055	5.44107	4.40504	5.85941	4.30221	4.13011	4.70443	4.02135	14.8071	5.87767		7.31273	16.0727	8.57374		9.4962	7.97099	6.48389	3.85973	3.47856	5.38104	4.96784	6.51045	4.8965	6.28318	4.89538	5.02147	12.8829	19.3166	19.1859
1-Heptanol	111-70-6	28.118	96	8.63627	9.43912	8.3308	11.3286	12.613	8.96481	13.5301	12.3605	12.5411	20.3325	23.2656	16.1861	28.9193	22.0064	19.4277	31.6325	33.6885	38.5923		8.52647	8.4411	8.48063	8.93611	7.88274	8.77916	8.0466	10.2999	10.4522	14.1699	16.2749	14.3056	30.3461	62.4386	37.7241
1-Octanol	111-87-5	31.319	95	6.89385	6.62352	3.13737	16.7873	20.2998	12.7407	24.234	20.0038	21.7847	26.8864	38.7998	28.8495	48.2547	49.4116	57.9807	42.1655	75.3509	43.7413		12.9233	10.4843	7.85715	8.41048	5.65291	7.94252	4.29516	7.1834	10.119	19.0931	19.3676	15.8221	30.5688	70.4445	67.458
1-Hexanol	111-27-3	24.355	96	2.94278	2.84605		11.0517	14.4465	9.6332	10.7019	8.00534	12.601	138.24	210.384	87.0053	205.179	208.808	193.43	227.239	243.926	241.542		13.6662	9.29193	14.5195	13.3944	7.23255	13.0557	12.4119	20.5884	71.5821	215.075	254.841	187.234	352.526	380.205	347.162
Ethanol, 2-(2-ethoxyethoxy)-	111-90-0	33.172	88	0.853704														3.00265		2.82222
1-Dodecanol	112-53-8	41.222	96
1-Decanol	112-30-1	36.665	91
Diethyl carbitol	112-36-7	33.17	69																													1.40637		1.44572
.alpha.-Santalol	115-71-9	45.956	81													4.36711																					16.8785
1,3-Propanediol, 2-butyl-2-ethyl-	115-84-4	28.74	78																		5.58833
6-Tridecanol, 3,9-diethyl-	123-24-0	27.05	78																													12.33					113.39
1-Butanol, 3-methyl-	123-51-3	19.993	87							5.61945
1-Butanol, 2-methyl-	137-32-6	18.205	97										18.6317	22.4199		45.9083	53.1969	53.1317	35.4755	51.304	62.1155											28.9323	37.7341	32.1101	49.5768	56.1175	55.1908
1-Nonanol	143-8-8	34.132	87	3.07965	2.34995	1.3336	5.77078	5.65719	4.88016	6.64526	6.12018	7.37667	11.3813	9.14674	10.857	15.0942	13.7065		24.1693	31.3033	14.1078		5.41274	4.68832	3.88203	4.1155					8.36311	7.74272
Nerolidol	142-50-7	34.31	80
Cyclohexanol, 5-methyl-2-(1-methylethyl)-, (1.alpha.,2.alpha.,5.beta.)-	491-1-0	33.718	72																												3.42708
9,12-Octadecadien-1-ol, (Z,Z)-	506-43-4	38.41	76
Cyclohexasiloxane, dodecamethyl-	540-97-6	31.571	69			1.06567																	4.00678
4-Ethyl-4-heptanol	597-90-0	29.143	78
3-Octanol	589-98-0	25.885	91													4.62783					10.2573
2-Nonanol	628-99-9	30.145	97	0.839916	0.725933	1.97613
Cyclooctyl alcohol	696-71-9	32.992	90	0.794056							3.03856		6.79537		3.70505		13.94	14.3554	15.1598	15.387	11.8837										2.53418
2-Hexen-1-ol, (E)-	928-95-0	26.428	91																															7.42496
3-Hexen-1-ol, (Z)-	928-96-1	25.64	97	3.32196	3.27999		21.7891		24.0331	26.5437	16.069	9.33414											25.7708	22.2917	32.4071	26.9494	13.3441	25.1268	22.7738	37.1865	15.7616	2.44246	3.40299	3.63295
1,5-Hexanediol	928-40-5	40.39	74													5.11166
Cyclohexanol, 5-methyl-2-(1-methylethyl)-	1490-4-6	33.721		2.2231	3.20903	1.08942																				3.11893	2.87892	3.97258
Cyclodecanol	1502-5-2	32.965	91
2-Hexanol, 2,5-dimethyl-, (S)-	3730-60-7	30.16	86																													1.44506
1-Octen-3-ol	3391-86-4	27.957	91	3.36841	4.29845	0.993703	11.5869	12.4281	11.2957	14.1485	9.69745	15.568	20.9009	24.2337	18.4246	24.6694	25.7452		35.2804		27.7704		17.6693	13.7516	8.19638	10.745	8.67447	12.4755	10.2468	14.1181	12.899	22.0962	18.6701	19.2142	19.1332		33.4193
1,9-Nonanediol	3937-56-2	37.53	91																																3.65975
2-Decen-1-ol, (Z)-	4194-71-2	29.595	89
trans-2-Pinanol	4948-29-2	35.906	80																													3.19198
3-Nonen-1-ol, (Z)-	10340-23-5	34.826	96																				2.37206	1.4155	1.70415
3-Hepten-1-ol	10606-47-0	26.517	83											10.8058
Cyclohexanol, 5-methyl-2-(1-methylethyl)-, (1.alpha.,2.beta.,5.alpha.)-(.+/-.)-	15356-70-4	33.741	97							1.26411	1.50968	1.37312											1.76221	1.22874	1.46043
2-Octen-1-ol, (E)-	18409-17-1	32.975	92				2.45571	2.73691	2.11979	3.66763		3.05678		7.89731		10.9214							2.25048	2.00111	1.77643			1.14663		1.50615		6.03873		5.50949
p-Mentha-2,5-dien-7-ol, trans-	19907-89-2	34.035	82															5.28566
1-Decanol, 2-methyl-	18675-24-6		92
Cyclohexaneethanol, acetate	21722-83-8	30.529	90																													5.37718	9.91681	5.57213	28.8326	69.0237	82.7371
2-Octen-1-ol	22104-78-5	32.979	90
1,2:5,6-Dianhydrogalactitol	23261-20-3	40.391	74																	29.7113
Arabino-Hex-1-enitol, 1,5-anhydro-2-deoxy-	26566-29-0	34.174	66																														10.4802
1,5-Heptadien-4-ol, 3,3,6-trimethyl-	27644-4-8	47.327	83																																		7.57224
2-Octen-1-ol, 3,7-dimethyl-	40607-48-5	36.758	80
(-)-cis-Myrtanol	51152-12-6	36.76	81
2-Ethyl-1-hexanol, trifluoroacetate	53800-8-1	36.63	85																										1.79862
Zorubicin	54083-22-6	34.28	68																																6.90462
5-Decen-1-ol, (E)-	56578-18-8	37.505	92													3.60672	4.07304				5.23169
2-Hexen-1-ol, acetate, (Z)-	56922-75-9	23.419	97
5-Octen-1-ol, (Z)-	64275-73-6	32.971	91																														7.90341
Cyclopentanemethanol, 3-methylene-	74793-20-7	17.789	77			1.48988
(+)-Cycloisolongifol-5-ol	74841-81-9	40.87	79																																		2.72996
1-Octanol, 2-butyl-	3913-02-08	21.81	89
3-Hepten-1-ol, (E)-	2108-05-06	26.532	82										2.6727
2-Methyl-3-decanol	83909-79-9	28.955	77													2.47875
Bergamotol, Z-.alpha.-trans-	88034-74-6	39.336	85										1.50182			25.6607	8.07052		18.1479	40.421	24.8716														26.1521	44.1158	48.5156
1-Phenanthrenol, 1,2,3,4,4a,9,10,10a-octahydro-4a-methyl-, (1.alpha.,4a.alpha.,10a.alpha.)-	98304-41-7	42.605	65
2-Nitro-4-nonanol	103077-85-6	34.947	75	2.35109
Henicosan-2-ol	121232-91-5	30.055	67																												1.94367
1-Naphthalenol, 1,2,3,4,4a,7,8,8a-octahydro-1,6-dimethyl-4-(1-methylethyl)-, [1S-(1.alpha.,4.alpha.,4a.beta.,8a.beta.)]-	133645-25-7	37.845	77																																		9.45207
6-Tridecanol	1413555	27.12	78																																	99.12
Cyclohexanol, 4-(1-methylethyl)-	993925	32.46	78																												1.87834
1-Nonadecanol, TMS derivative	0-0-0	31.716	65
2-Isopropyloxan-4-ol	0-0-0	29.125	76
2,4,4,6,6,8,8-heptamethyl-1,3,5,7,2,4,6,8-tetraoxatetrasilocan-2-ol	0-0-0	30.236	77																																		14.0028
Cyclohexanemethanol, 2-methylpropionate	0-0-0	26.692	83																												3.9975
			总数	104.335			254.357			295.67			861.826			1392.25			1605.79				303.352			224.013			324.384			1405.44			2881.97
			单列总数	42.7216	39.9537	21.6594	88.72	77.989	87.6479	113.697	85.7196	96.2536	304.975	385.565	171.286	529.923	509.531	352.792	476.922	575.442	553.424		111.843	96.0741	95.4348	87.552	53.0052	83.4559	66.5095	100.168	157.706	478.97	506.734	419.732	802.02	1057.13	1022.82
Aldehydes
Hexanal	66-25-1	12.644	95	183.193	171.174	30.6745	780.987	536.4	397.918	395.026	412.179	345.231	233.739	392.791	352.377	135.757	99.242	96.5459	107.836	102.471	61.8491		449.986	261.94	328.132	359.302	190.199	251.658	346.805	409.84	516.874	11.3656	26.0841	19.5647			21.3259
Benzaldehyde	100-52-7	30.637	97	1.73055	1.79538	0.757092	5.21946	5.87611	4.19829	6.8523	3.99646	5.01883	4.86678	6.90239	5.50703	8.78941	9.89265				10.5613		4.60535	4.79677	3.03863	2.17632	1.50226	1.77212	2.0249	2.96765	3.76628	3.70984	3.15936	2.32842
Neral	106-26-3	36.163	85																																5.13379
Pentanal	110-62-3	9.1	89												29.0298
Heptanal	111-71-7	16.853	98	13.5531	11.839			27.7401		24.6435	20.0262	18.9816			14.7831											15.8949					9.29865
Decanal	112-31-2	29.628	94	8.28366	9.19481	2.93873	23.9882	23.8801	20.2237	27.2488	26.2869	29.2403	37.9671	26.5523	39.1519	47.7795	37.854	84.9899	33.7122	84.7032	37.1923		45.6205	31.7434	22.8115	25.2664	16.2365	21.7118	20.869	26.6296	18.2328	54.736	55.503	47.6379	64.2234	84.0919	103.659
Nonanal	124-19-6	25.958	95	38.5715	33.9618	16.3008	110.612	131.692	74.9471	162.62	118.426	107.058	81.4979	99.2995	114.078	109.866	94.6831	80.4146	87.102	114.423	68.0351		99.5289	85.8663	50.8363	48.1103	38.4069	60.0354	46.8136	70.0198	60.1522	107.85	99.9528	78.6119	65.9641	97.3169	73.1123
Octanal	124-13-0	21.553	97	32.1964	31.1526	11.5461	65.9005	82.8624	33.5297	79.7117	65.4776	58.1662	28.9853	36.5358	58.7902	37.6308	25.7718	47.8689	44.7548	48.1306	18.4434		34.4851	28.4137	17.5659	23.5963	19.5206	23.4312	12.1215	21.0248	42.2194	33.9968	28.5336	29.9699	25.9966	22.3553	15.35
2,6-Octadienal, 3,7-dimethyl-, (E)-	141-27-5	36.19	92										2.49089			11.6902	7.96996				14.3146			1.52104	1.39979
2,4-Hexadienal, (E,E)-	142-83-6	26.34	89	2.91853	6.80908										1.9541								15.8468			7.62301	2.16808	6.42531	10.017	11.4024	7.89715
2-Hexenal	505-57-7	18.547	97	16.3314	15.5966																					63.2575		30.4285	96.2774		88.6269
2,6-Nonadienal, (E,Z)-	557-48-2	32.31	87					1.30699	1.70265			1.7354	2.75269	2.3483	3.70143	3.07958	3.20507		4.77391		5.61412		2.54492	2.20507							1.87173	2.04585		1.33172
2-Octenal, (E)-	2548-87-0	27.378	93	14.1406	11.741	10.249	30.6197	42.8126	24.0419	46.0308	32.6599	37.4594	47.4774	50.9226	31.2863	79.4464	75.9978	64.9214	59.0535	62.9053	66.0552		17.8676	18.2782	14.2399	19.8964	11.3528	12.0269	6.03642	10.8563	25.0876	19.9069	21.4903	25.8012	31.1777	48.2463	40.6326
2-Undecenal	2463-77-6	36.645	91	6.94455	5.53895	2.65075		66.51	53.0788	20.1229	31.4844	54.6935			77.163	26.7084	41.0624				91.541					4.04978	2.54373	3.39556			7.05843	4.70297	5.16929	4.48148	20.4443
2-Decenal, (E)-	3913-81-3	33.914	94	12.9427	13.606	6.05986	29.9269	34.7519	11.7422		28.6104	26.628	21.5579	32.3442	21.1689	33.826	23.55	23.9582	23.4358	34.2398	23.485		10.2027	10.2027	7.26213	5.75222	4.29159	3.82387	1.74658	3.21132	8.12151	5.56069	4.67265	5.20074	6.63235		9.60069
2-Hexenal, (E)-	6728-26-3	18.537	97				91.5077	47.9234	41.751	23.1133	37.9161	63.4125	139.562	238.399	207.842	94.3916	58.776	87.327	49.8924	63.3824	31.7727		64.958	37.9205	51.7446	18.2345	22.3978		16.0287	102.449		109.621	228.978	152.16	109.127	92.3741	60.7485
2,4-Nonadienal, (E,E)-	5910-87-2	35.487	81	0.934794	1.08254	0.437546	3.24563	5.98429		4.21188	2.52478	4.19559	5.7304	5.58597	3.96491	7.05484	7.78774	7.05568		6.15042	9.45432		1.91559		1.45556	1.38571				1.53674		1.54392	1.68564	1.53127	7.87516		9.76657
2-Heptenal, (E)-	18829-55-5	23.243	93	22.4454	20.0218	7.29231	40.4989	51.353	23.8338	62.6087	37.1398	42.6469		79.9979	29.0208					78.7221	40.2233		21.1062	20.5081	19.6131
2-Nonenal, (E)-	18829-56-6	30.848	97	4.84856	6.10968	2.93735	16.9732	18.587	16.5114	19.9718	17.462	30.625	65.9338	43.0601	40.3175	103.311	94.0491	100.911	102.88	124.214	126.315		35.1866	23.019	16.4307	9.10663	6.61724	9.33207	7.99237	14.0672	13.3817	38.6699	33.0578	28.2621	54.2738	73.4807	59.0123
2-Dodecenal, (E)-	20407-84-5	39.15	92
4-Oxohex-2-enal	20697-55-6	37.085	91																				1.96934
(E)-Hexadec-2-enal	22644-96-8	34.31	79																																2.2288
2,4-Decadienal, (E,Z)-	25152-83-4	36.955	94				4.03708	3.44694	2.36153	2.64726	1.69041	5.16499	6.85985	9.83401	8.46595	13.5255	13.7855				13.1413		3.4065	2.56338		2.39319					6.6009
2,4-Decadienal, (E,E)-	25152-84-5	38.125	95							2.35092	1.6025	1.295	2.17149	2.1115	1.13953	4.77944	3.85297				3.45062
2,4-Octadienal, (E,E)-	30361-28-5	32.5	90										1.27564
2-Undecenal, E-	53448-7-0	36.636	76										39.8312
2,5-Dihydroxybenzaldehyde, 2TMS derivative	56114-69-3	30.424	78	2.3577		3.13682	4.50778	4.73192	3.44108	7.8153	3.13433	9.45735	10.9249	12.9004	6.83725	11.8986	12.3212	17.7762	16.6787	19.1573	16.408				2.82456	1.83642	2.01124	2.2129		3.90823	9.68256	2.99814	2.66828	7.55973	7.88732
Cyclohexanebutanal, 2-methyl-3-oxo-, cis-	92485-93-3	39.13	77
3-((1S,5S,6R)-2,6-Dimethylbicyclo[3.1.1]hept-2-en-6-yl)propanal	203499-8-5	39.299	84
2,4-Heptadienal, (E,E)-	881395	28.68	95				1.72025	2.95292		3.026	1.48698	1.21031	2.2098																		1.43662
2,4-Heptadienal, (E,E)-	4313-03-05	28.625	92
Tricyclo[7.1.0.0[1,3]]decane-2-carbaldehyde	0-0-0	38.82	79
3-Hydroxy-4-methoxybenzaldehyde, TBDMS	0-0-0	29.724	72											20.6185	21.5439	21.8232	22.4533		36.6552				14.942	13.6892	12.3791
			总数	795.996			3007.84			2572.33			2864.16			1995.38			1943.13				1916.57			1351.38			2064.95			1312.1			1212.04
			单列总数	361.392	339.623	94.9808	1209.74	1088.81	709.281	888.002	842.104	842.22	735.834	1060.2	1068.12	751.357	632.255	611.769	566.774	738.499	637.856		824.173	542.668	549.734	607.881	317.248	426.254	566.733	677.913	820.309	396.707	510.955	404.441	400.964	417.865	393.208
Esters
Butyrolactone	96-48-0	33.825	93	1.69138
Propanoic acid, 2-methyl-, 3-hydroxy-2,2,4-trimethylpentyl ester	77-68-9	39.263	92	0.961664	0.856376				1.55755	2.90243	1.98512	2.23806			2.07688		4.01072						2.20182	1.70504	1.97667	0.965686		1.50684		1.94987	2.54079			3.03975
Acetic acid, methyl ester	79-20-9	5.841	97													165.999		31.771	45.6078	93.1918	129.487
1,2-Benzenedicarboxylic acid, bis(2-methylpropyl) ester	84-69-5	52.676	96																												1.70725
Dibutyl phthalate	84-74-2	56.845	93
Acetic acid, 2-phenylethyl ester	103-45-7	38.23	96			0.693812							1.53134			9.62296	5.51275			27.5054	16.6095											2.44157	1.73905		21.7427	24.8789
n-Propyl acetate	109-60-4	8.96	94									2.05598	275.709	244.177	44.0814	567.098	366.525	417.217	664.775	910.993	606.898														580.738	635.67	562.15
Butanoic acid, butyl ester	109-21-7	18.017	97											6.386				5.14808
Acetic acid, heptyl ester	112-6-1	25.105	96	2.38829		1.69937	1.35687	1.62686		1.34377	2.26802	4.15558	48.769	41.4584	9.53207	244.526	183.402	223.119	114.63	296.707	258.558		2.12962	2.20285	2.14549	9.14625	4.96361	4.17384	3.94248	4.41614	7.00659	48.6008	30.395	14.8701	207.828	447.238	460.867
Acetic acid, octyl ester	112-14-1	28.711	91										10.8068	11.2749	3.77189	56.9105	47.2355	70.7176	21.6579	39.2711	37.2338					2.533	1.42303		1.3099	1.45011	3.23733	17.8747	10.859	4.2354	40.3863	116.143	140.968
Acetic acid, butyl ester	123-86-4	12.231	96	28.8182		10.4389			7.00935		9.73997	58.4757	1897.08	2036.75	559.976	3612.01	3381.72	3658.48	2284.72	3413.51	2185.37		18.5851	26.2704	19.2102	182.054	82.3951	64.7974	59.4849	92.8019	128.213	3371.93	3067.2	3003.95	4825.56	5970.9	4604.02
Ethyl Acetate	141-78-6	6.83	73										311.052	29.2201	6.82411	899.684	532.501	649.614	458.891	903.85	913.696														692.256	927.508	868.847
Citronellyl butyrate	141-16-2	36.755	83
Acetic acid, hexyl ester	142-92-7	20.741	97	165.422	56.917	85.6117	97.2027	94.6198	64.7363	98.3638	137.873	258.869	4002.68	3900.91	747.497	12066.5	10772.2	11745.4	6406.11	12396.4	9776.07		177.797	173.893	188.215	742.971	387.828	365.307	347.153	395.776	2083.81	3866.13	4002.72	2249.92	11364
1-Butanol, 2-methyl-, acetate	624-41-9	14.065	97													65.9129	36.9298	41.963	20.5085	38.6063	22.668											6.44373				22.2958	53.8012
Acetic acid, pentyl ester	628-63-7	16.256	95	3.21778				5.85523			15.6877	45.9316	379.469	555.467	59.2377	679.914	675.522	769.638	715.222	948.597	263.774		6.79694	7.33355						18.8043	108.493	534.366	469.694	435.551	1129.02	1347.64	989.621
2-Hexen-1-ol, acetate, (E)-	2497-18-9	23.478	94										5.71287				10.7202																7.68193	5.72039
Butanoic acid, hexyl ester	2639-63-6	26.585	93															19.0204	9.40145	16.0489	4.41746
Propanoic acid, hexyl ester	2445-76-3	23.52	91																	7.07393																	7.68709
2,4-Decadienoic acid, ethyl ester, (E,Z)-	3025-30-7	38.63	94
3-Hexen-1-ol, acetate, (E)-	3681-82-1	22.37	97					1.9389		2.87434	2.06214		3.94362	3.64878	3.2588	12.6455	12.5903	14.5219	9.12558	12.6711	9.25862		3.57577	2.42003	4.16929	9.65873	12.9305	27.6041	16.4127	24.2216	17.8496	5.77357	6.10664	3.71903	22.6068	29.4811	25.2552
3-Hexen-1-ol, acetate, (Z)-	3681-71-8	22.84	93													5.40992																10.1105		10.3529
5-Hexene-1-ol, acetate	5048-26-0	23.017	92												5.50393			91.3301	85.7869		18.5815											60.1916	52.8631	51.7682	91.2355	102.566	83.9258
D-Arabinose, diethyl mercaptal, tetraacetate	5329-45-3	6.43	34																											1.49884
Andrographolide	5508-58-7	42.447	81
Hexylene glycol diacetate	6222-17-9	41.83	77																		4.84379																24.7965
2,2,4-Trimethyl-1,3-pentanediol diisobutyrate	6846-50-0	39.416	95	1.02937	1.16804					1.39854									11.9554		2.73392		1.2345		1.44722					2.08077	4.38945			2.13202
Octanoic acid, 3-hydroxy-, methyl ester	7367-87-5	39.043	91
Butanoic acid, 2-methyl-, hexyl ester	10032-15-2	27.145	92													4.76248
Butyl 2-methylbutanoate	15706-73-7	19.097	92																																	26.4484	15.3141
Propanoic acid, 2-methyl-, 4-methylpentyl ester	35852-44-9	26.725	84													7.51852	7.67251
3-Methylpentyl acetate	35897-13-3	21.319	87																																	17625.2	16688.5
Octadecanoic acid, 1-[(tetradecyloxy)carbonyl]pentadecyl ester	69688-49-9	30.396	62																				3.59709
Chrysantenyl 2-methuylbutanoate	53820-13-6	42.905	81																												1.42029	3.3883	4.30555	1.37368	48.9329	102.017	81.6015
Butanoic acid, 2-ethyl-, 1,2,3-propanetriyl ester	56554-54-2	35.454	75						3.08447												7.29968
[1,1'-Bicyclopropyl]-2-octanoic acid, 2'-hexyl-, methyl ester	56687-68-4	41.835	58
Octan-2-yl palmitate	55194-81-5	57.078	94				4.50143																											4.16527
2-Hexen-1-ol, acetate, (Z)-	56922-75-9	23.404	95											5.92514				27.469													6.79713						35.9992
4-Hexen-1-ol, acetate	72237-36-6	23.405	87										2.60246	1.39852		15.8231	8.97471			12.4225	11.1244											11.1158	5.45579	3.61183	24.9429	34.3042
N-Ethylamphetamine acetate	72687-64-0	37.131	66																												6.22347			3.11619
Propanoic acid, 2-methyl-, 2-ethyl-3-hydroxyhexyl ester	74367-31-0	39.265	77															27.3715
Butanoic acid, 2-methyl-, 2-methylpentyl ester	83783-88-4	45.697	81
Benzoic acid, 2-formyl-4,6-dimethoxy-, 8,8-dimethoxyoct-2-yl ester	312305-58-1	29.707	71																		29.9223
3,7-Dimethyl-1-octyl methylphosphonofluoridate	345260-82-4	36.665	85																											3.02535
Sulfurous acid, cyclohexylmethyl pentadecyl ester	0-0-0	32.279	84
Succinic acid, tridec-2-yn-1-yl pentafluorophenyl ester	0-0-0	30.366	66
(E)-Dodec-2-enyl isobutyl carbonate	0-0-0	36.375	76
4-Ethylbenzoic acid, 6-ethyl-3-octyl ester	0-0-0	36.609	73											91.3648
4-Ethylbenzoic acid, cyclohexyl ester	0-0-0	36.626	73																						5.96115
4-Ethylbenzoic acid, 2-ethylhexyl ester	0-0-0	36.594	72																						17.9604
3-(Methylthio)propyl acetate	0-0-0	33.509	86
2-Hydroxymandelic acid, ethyl ester, di-TMS	0-0-0	15.975	72
4-methylpentanoic Acid, 2,2,2-trifluoroethyl ester	0-0-0	42.603	71
Pyrrole-2-carboxylic acid, 4-(1-chlorodec-1-enyl)-3,5-dimethyl-, ethyl ester	0-0-0	47.217	60																												3.30408
Acetic acid, [4-(1-hydroxy-1-methylethyl)cyclohex-1-enyl]methyl ester	0-0-0	27.743	74
p-Trimethylsilyloxyphenyl-(trimethylsilyloxy)trimethylsilylacrylate	0-0-0	16.358	81																														28.5953
3-Cyclopentylpropionic acid, nonyl ester	0-0-0	45.336	74																																10.5292
2,6-Nonadienoic acid, 9-(3,3-dimethyloxiranyl)-3,7-dimethyl-, methyl ester, (E,E)-	1241771	41.829	68
			总数	360.914			283.489			648.224			15309.1			52252.7			44263.8				670.828			1900.26			3349.32			21423.5			71115.5
			单列总数	203.528	58.9414	98.4438	103.061	104.041	76.3877	106.883	169.616	371.726	6939.36	6927.98	1441.76	18414.3	16045.5	17792.8	10848.4	19116.9	14298.5	0	215.918	213.825	241.085	947.329	489.54	463.39	428.303	546.025	2374.99	7938.37	7687.61	5797.52	19059.8	27412.3	24643.4
Ketones
Isophorone	78-59-1	32.681	88	0.927116																						2.74717
2(3H)-Furanone, 5-heptyldihydro-	104-67-6	45.256	88																12.4897		10.8937
3-Octanone	106-68-3	19.796	95																3.69229	10.4525				3.60273								6.92778
2-Octanone	111-13-7	21.396	97	13.945	12.1833	12.8627	13.6326		10.1811	14.812	13.3343	13.4394	10.7436	9.39822		14.3693	10.9699				5.33755		12.5869	12.8453	14.4231	12.3971	12.2069	11.3579	10.6824	13.1651	19.9383	20.6389	14.2587	15.1008	22.418
2,5-Hexanedione	110-13-4	23.16	89								2.95216	3.80075
5-Hepten-2-one, 6-methyl-	110-93-0	23.764	93	11.7329	13.7931	3.24094	20.8878	27.1017	27.7575	25.4823	24.3144	27.7692	17.4267	9.36744	20.8203	53.0404	41.7971	37.0514	34.2597	36.695	50.5622		52.8292	36.6985	34.4852	27.0267	24.6991	30.6357	27.8979	42.7191	29.762	14.6993	14.3181	12.0094	30.1877	43.2762	42.7014
Normethandrone	514-61-4	2.785	31																												1.31595
2,3-Octanedione	585-25-1	23.01	91					4.84399	3.66919
5,9-Undecadien-2-one, 6,10-dimethyl-	689-67-8	39.02	92																																	12.766	15.4315
2-Decanone	693-54-9	29.52	86																													4.16105
3-Octen-2-one	1669-44-9	26.535	82														4.18733
2,5-Octanedione	3214-41-3	23.1	92				3.99299																3.21873	5.03399	2.80031
5,9-Undecadien-2-one, 6,10-dimethyl-, (E)-	3796-70-1	38.965	97	7.61029	9.1816	3.55805	20.5331	27.4318	22.3666	23.706	23.1306	24.8338	22.2721	23.8041	24.44	19.1056	18.0087	23.5009	26.4023	22.8181	22.6197		34.96	31.8842	30.75	17.1427	17.3164	20.2915	17.2027	25.7701	23.2744	22.8504	19.4023	17.7687	12.5314
1-Octen-3-one	4312-99-6	22.154	94	6.98913	6.18797	3.17588	18.1482	21.2156	14.701	23.2003	18.1839	19.745	22.5516	12.8221	15.2801	28.2787	25.0804	30.5231	25.4835	27.4054	26.4476		11.2111	9.95047	10.4484	11.8664	8.73203	9.50279	5.02762	11.8774	18.6393	18.4053	14.3142	19.0562	28.5101	24.7895	16.6382
9-Octadecanone	18394-0-8	42.637	67													9.56563	7.03874
2,15-Hexadecanedione	18650-13-0	27.115	79																														8.37336
2,2-Dimethyl-3-heptanone	19078-97-8	41.44	90		1.42253
2-Methyl-6-methyleneoct-7-en-4-one	19860-68-5	41.412	89																									1.67437	2.81188		2.39226
4-Nonanone, 7-ethyl-	40237-88-5	35.875	78																		7.2932
2-Buten-1-one, 1-(2,6,6-trimethyl-1,3-cyclohexadien-1-yl)-	23696-85-7	38.346	80	1.22264				2.65916
2-Buten-1-one, 1-(2,6,6-trimethyl-1,3-cyclohexadien-1-yl)-, (E)-	23726-93-4	38.359	81		1.13874	1.02688	2.64806		2.37816	3.01075	3.79101	2.85971	2.87903	2.7673	4.43498	6.51061	5.01212	19.4445			8.13315		4.33551	2.97749	3.47852	2.68603	2.12895	3.13414	1.73198	2.81389	3.47517	3.44048	3.77226	6.65399
4',6'-Dimethoxy-2',3'-dimethylacetophenone		29.755	73			6.47011
2,2,6,7-Tetramethyl-10-oxatricyclo[4.3.0.1(1,7)]decan-5-one	121747-63-5	36.34	76							1.01975
Benzo[a]4,7-phenantrolin-9(7H)-one, 8,10,11,12-tetrahydro-8-(3-methyl-2-thienyl)-	0-0-0	4.26	33																												3.13169
1H-Indole-2,3-dione, 1-(tert-butyldimethylsilyl)-5-chloro-, 3-(O-ethyloxime)	0-0-0	9.644	42																												2.12487
trans-Hexahydro(5H)cyclohepta-1,4-dioxin-2(3H)-one	0-0-0	26.581	87																															3.30488
2,4'-Dimethoxy-2'-(trimethylsilyl)oxychalcone	0-0-0	31.485	68																		7.81573										7.80863
Dihydrotestosterone 3-formate-17-benzoate	0-0-0	34.295	72																																		14.8749
			总数	116.669			244.148			269.385			199.007			353.485			338.801				318.52			215.546			273.562			239.456			264.125
			单列总数	42.427	43.9072	30.3346	79.8427	83.2522	81.0534	91.2311	85.7064	92.4479	75.873	58.1592	64.9753	130.87	112.094	110.52	102.327	97.3711	139.103	0	119.141	102.993	96.3856	73.8662	65.0834	76.5965	65.3544	96.3455	111.862	91.1232	74.4389	73.8941	93.6471	80.8317	89.646
Acids
Acetic acid	64-19-7	28.355	95				5.34397	5.71489	5.83497		3.47874	4.69215	26.7394	14.9787	8.56921	29.111	30.922	35.3789	54.973	45.6944	68.6306		4.56183	4.40539	3.22485										30.7416	35.881	36.0303
Propanoic acid, 2,2-dimethyl-	75-98-9	32.112	75						2.25786		2.01194														1.62698
Tartronic acid	80-69-3	4.365	43																												3.43862
Butanoic acid	107-92-6	33.526	93																														2.28356	2.40828
Pentanoic acid	109-52-4	38.7	89																										1.89389
Nonanoic acid	112-5-0	45.255	96	2.33015	1.55416	6.25057	3.33814	2.3751		2.61234	2.66893	2.65916	2.73959	2.73094	3.57034			19.3399
Butanoic acid, 2-methyl-	116-53-0	34.6	97	0.77037	1.18521		3.26808	3.84686	5.40155	3.943	5.68981	5.76534	64.3163	57.2179	30.6307	101.252	82.1703	87.2806	41.4858	41.8375	56.0426		2.915	2.53441	1.82516	2.46387	1.53688	2.11145	1.78725	3.15145	3.91105	15.8312	14.466	26.3281	96.0338	112.305	123.839
Octanoic acid	124-7-2	43.207	96	0.953698		0.936667	2.03777						1.80581		1.4959
Hexanoic acid	142-62-1	38.744	83	2.39446	2.48185	1.05765	11.9621	9.49813	8.61686	5.8386	4.66175	5.08036	12.9091	10.006	6.78084	15.98	15.3949	38.7254	25.7446	37.0621	20.1405		13.1607	10.6369	9.52097	3.70819		1.715		2.73874	13.2004		2.66084	2.03046
Dodecanoic acid	143-7-7	51.132	94				2.13453
n-Decanoic acid	334-48-5	47.215	95			0.993825	1.77466								1.66001
Tetradecanoic acid	544-63-8	56.484	93				8.19894
Butanoic acid, 4-hydroxy-	591-81-1	33.846	90			1.30033
1-Cyclohexene-1-carboxylic acid	636-82-8	43.276	75													8.13816																			16.6611	15.715	34.4695
n-Hexadecanoic acid	1957-10-03	49.38	89					14.0223
Undec-10-ynoic acid	2777-65-3	43.196	75																		5.25024
Cyclopentylcarboxylic acid	3400-45-1	33.93	58												2.98803
Phosphonoacetic Acid, 3TMS derivative	53044-27-2	31.56	70	1.9829				3.92019					3.73568		4.85544					14.2317
Butanoic acid, 2-ethyl-, 1,2,3-propanetriyl ester	56554-54-2	35.454	75						3.08447
5-Imidazolic acid, 2-[4-bromophenylazo]-	0-0-0	4.114	35																												2.92146
			总数	24.1918			102.631			49.1021			257.73			463.693			411.093				54.4121			11.5354			33.0428			66.0085			501.677
			单列总数	8.43157	5.22121	10.539	38.0582	39.3774	25.1957	12.3939	18.5112	18.197	112.246	84.9336	60.5505	154.481	128.487	180.725	122.203	138.826	150.064	0	20.6375	17.5767	16.198	6.17206	1.53688	3.82644	3.68114	5.89019	23.4715	15.8312	19.4104	30.7669	143.437	163.901	194.339
Camphanes
Cycloheptasiloxane, tetradecamethyl-	107-50-6	29.907	81	21.3975	42.1792	1.95285	3.68935	4.53677	4.95855	3.87025	3.65206	4.28509	7.47387	6.73077	6.76499	15.6335	14.0114				7.36836		13.0131	12.6641	13.6544	6.23033	7.38896		9.08001	10.5504	11.2609
Ethane, 1,2-dichloro-	107-6-2	12.105	95																				2.12572	4.80484	3.31715	2.01308	3.86827
Hexasiloxane, tetradecamethyl-	107-52-8	34.298	80	1.61825	4.54626	0.925423	3.35643	3.58184	2.77895	2.86459	1.49023	2.30383	7.46637	4.747	5.15229		9.56089	28.1495			14.9987		4.42143	4.36922	4.91221	4.16979	4.88048		5.90679	4.91535
Cyclododecane	294-62-2	36.7	88																																	19.605
Cyclohexasiloxane, dodecamethyl-	540-97-6	24.174	72	5.08986	3.87233	1.25628	3.91192	4.72821	4.14146	3.46705	3.56873	4.74635	5.00919	7.90233	4.34283	8.00221	8.71737	13.9598	13.7012	15.2972	12.18					5.95537	4.94088	9.10597	9.83649	8.35611		14.8201	14.5332	15.7129	26.672	26.4853	30.3917
Heptasiloxane, hexadecamethyl-	541-1-5	37.853	85	2.0801	0.907279	1.06108	1.37161	1.72475	1.25874	2.90378	1.20668	1.04721	5.5828	4.26995	5.97504	5.82819	6.20415				10.9501		2.05065	2.25081	2.04495		0.838357	0.786264	1.25493	0.753791	1.36495		2.55645	6.43912
Hexadecane	544-76-3	32.48	94																											1.76049
Cyclotetrasiloxane, octamethyl-	556-67-2	9.83	95																				474.26	667.698	278.752	135.318	167.729	174.798	167.247	110.696	6.46455	95.6932	132.993	158.565	103.059
Tetracosane	646-31-1	49.347	96				10.073
Hexasiloxane, 1,1,3,3,5,5,7,7,9,9,11,11-dodecamethyl-	995-82-4	35.651	77	1.04645
Trisiloxane, 1,1,1,5,5,5-hexamethyl-3,3-bis[(trimethylsilyl)oxy]-	3555-47-3	41.055	65
Cyclopentane, 1-ethyl-1-methyl-	16747-50-5	26.265	86					2.45172					2.18856	6.20557	1.357	8.64404	8.48415		4.5671
Decane, 3,8-dimethyl-	17312-55-9	32.439	91
Octasiloxane, 1,1,3,3,5,5,7,7,9,9,11,11,13,13,15,15-hexadecamethyl-	19095-24-0	40.966	65																																		8.58881
Cyclohexane, cyclopropyl-	32669-86-6	26.309	86							10.7568
Cyclopentane, 1-methyl-2-methylene-	41158-41-2	26.544	89																		5.94021
Cyclopentane, 1-methyl-2-(2-propenyl)-, trans-	50746-53-7	26.339	86									3.45796
3-Butoxy-1,1,1,7,7,7-hexamethyl-3,5,5-tris(trimethylsiloxy)tetrasiloxane	72439-84-0	40.414	65																6.1271
5-Acetamido-5-propyldecane	71275-16-6	42.625	60																												2.51629
3-Isopropoxy-1,1,1,7,7,7-hexamethyl-3,5,5-tris(trimethylsiloxy)tetrasiloxane	71579-69-6	34.233	69													9.20711																		14.3842
3,3,5-Tributoxy-1,1,1,7,7,7-hexamethyl-5-(trimethylsiloxy)tetrasiloxane	72439-86-2	32.11	64															20.3709
3-Butoxy-1,1,1,5,5,5-hexamethyl-3-(trimethylsiloxy)trisiloxane	87867-97-8	32.097	74											4.9088	4.69732
7,8-Diazabicyclo[4.2.0]octane, 1-methyl-, 7,8-dioxide	169522-32-1	26.353	85			0.712924																											3.80227
Bicyclo[5.2.0]nonane, 2-methylene-4,8,8-trimethyl-4-vinyl-	242794-76-9	37.353	88																																9.10719		50.7048
Cyclopentane, 1,2-dimethyl-3-(1-methylethenyl)-	1856593	26.153	79																												8.96101
2,4,4,6,6,8,8-heptamethyl-1,3,5,7,2,4,6,8-tetraoxatetrasilocan-2-ol	0-0-0	30.244	78	7.2292	6.01375
Tricyclo[3.1.0.0(2,4)]hexane, 3,6-diethyl-3,6-dimethyl-, trans-	0-0-0	39.749	87													42.1898	12.292	31.5049													6.15607			2.85019	38.4295	142.554
Tricyclo[3.1.0.0(2,4)]hexane, 3,6-diethyl-3,6-dimethyl-, trans-	0-0-0	39.721	86																	28.9971
Cyclopropane, 1,1,2,2-tetramethyl-3-(2-phenylethenylideno)-	0-0-0	42.576	76																		11.1616											4.92043	3.83269	2.6528	29.1564	40.9924	41.6089
Tetracosane, 1-iodo-	0-0-0	27.666	89																										1.05937
			总数	101.889			52.5633			49.6206			90.7747			242.76			131.289				1490.34			528.023			368.14			473.756			567.355
			单列总数	38.4613	57.5189	5.90856	22.4024	17.0233	13.1377	23.8624	9.91771	15.8404	27.7208	34.7644	28.2895	89.5048	59.2699	93.9851	24.3954	44.2943	62.599	0	495.871	691.787	302.681	153.687	189.646	184.69	194.384	137.032	36.7237	115.434	157.718	200.604	206.424	229.637	131.294
Terpenes
Styrene	100-42-5	20.039	96
1-Dodecene	112-41-4	23.254	90																									19.1212
.alpha.-Farnesene	502-61-4	36.389	96										14.0724	3.28472	3.65234	327.432	108.957	187.583		133.748	366.972										52.7229	16.7904	40.4085	50.5932	234.73	775.567	970.868
1H-3a,7-Methanoazulene, 2,3,6,7,8,8a-hexahydro-1,4,9,9-tetramethyl-, (1.alpha.,3a.alpha.,7.alpha.,8a.beta.)-	560-32-7	39.785	85																		3.00854
2-Undecene, (Z)-	821-96-5	23.215	89										62.1326
1-Undecene	821-95-4	23.262	90																							26.8017	16.5273				43.8279
1,4-Hexadiene, 4-methyl-	1116-90-1	26.533	90	5.68186		1.70281	11.9099			8.52967	11.5858	4.39965													6.50079				8.8262
Pentalene, octahydro-2-methyl-	3868-64-2	26.379	85
Tricyclo[5.4.0.0(2,8)]undec-9-ene, 2,6,6,9-tetramethyl-, (1R,2S,7R,8R)-	5989-08-02	29.48	83																																5.16949
6,7-Dioxabicyclo[3.2.2]non-8-ene	6786-21-6	17.772	74	3.92484
2-Octene, 2-methyl-6-methylene-	10054-9-8	26.19	89
trans-.alpha.-Bergamotene	13474-59-4	35.786	94
Cyclohexene, 4-(1,5-dimethyl-1,4-hexadienyl)-1-methyl-	17627-44-0	36.595	78																																		26.3918
Bicyclo[3.1.1]hept-2-ene, 2,6-dimethyl-6-(4-methyl-3-pentenyl)-	17699-5-7	35.844	95													54.1884		33.8527		28.4407	58.3724										6.45107		6.69703	3.27909	40.1934	133.082	177.342
(E)-.beta.-Famesene	18794-84-8	34.335	86													2.35274																				14.3728
2,4-Hexadiene, 3-methyl-	28823-42-9	26.515	91				23.012	14.3884	12.4879															9.34957	12.4977
2,4-Hexadiene, 2-methyl-	28823-41-8	26.316	91																				8.0782	5.07658						11.8485
(E)-1-Methyl-4-(6-methylhept-5-en-2-ylidene)cyclohex-1-ene	53585-13-0	40.501	86													21.7509	7.44959				38.5619										3.03047	3.85077	3.43438	3.32174			149.568
2-Undecene, 4,5-dimethyl-, [R*,R*-(E)]-	55170-92-8	32.313	86																										12.5038	24.5669
8-Heptadecene, 1-chloro-	56554-80-4	41.22	76																																		6.88989
1,6-Heptadiene, 2,5,5-trimethyl-	62238-28-2	26.395	89																																		8.07085
Cyclodecene, 1-methyl-	66633-38-3	29.955	88																																12.8957	17.0556	19.5309
Farnesene epoxide, E-	83637-40-5	46.446	78													2.90445					3.2484															13.3804	14.8378
Cyclohexene, 1-formyl-2-phenylsulfinylmethyl-3,3-dimethyl-	81054-0-4	36.785	60
(1S,5S)-2-Methyl-5-((R)-6-methylhept-5-en-2-yl)bicyclo[3.1.0]hex-2-ene	159407-35-9	35.595	68																		7.4785
Geraniol	106-24-1	38.68	97	1.44908	1.63314	0.763548				0.970639		1.21236		2.15977		6.55013	5.54331				9.92141		3.28454	3.366	3.25012				1.49861	2.13404		5.26724	1.89046
Citronellol	106-22-9	36.78	89										18.8305				28.9985				48.3221
			总数	11.3095			61.7982			24.5151			83.1421			746.47			639.83				41.5028			62.4503			163.778			128.375			2619.95
			单列总数	9.6067	0	1.70281	34.9219	14.3884	12.4879	8.52967	11.5858	4.39965	76.205	3.28472	3.65234	408.628	116.406	221.435	0	162.188	477.642	0	8.0782	14.4262	18.9985	26.8017	16.5273	19.1212	21.33	36.4155	106.032	20.6412	50.5399	57.194	292.988	953.458	1373.5
Phenols
Methyleugenol	甲基丁香酚	93-15-2	42.364	96																												20.0284
2,4-Di-tert-butylphenol	2,4-二叔丁基苯酚	96-76-4	47.9	94	0.743236	0.988662
Phenol	苯酚	108-95-2	42.355	95			0.591372																		1.47053					1.26304	1.44847
				总数	2.32327			0			0			0			0			0				1.47053			0			22.7399			0			0
				单列总数	0.743236	0.988662	0.591372	0	0	0	0	0	0	0	0	0	0	0	0	0	0	0	0	0	1.47053	0	0	0	0	1.26304	1.44847	20.0284	0	0	0	0	0	0
Benzenes
Benzene, 1,2-dimethoxy-4-(1-propenyl)-	1,2-二甲氧基-4-（1-丙烯基）苯	93-16-3	45.707	86																												2.12798
Benzene, 1,2-dichloro-	1,2-二氯苯	95-50-1	27.805	97																				2.99352	2.95219	1.86044
o-Xylene	邻二甲苯	95-47-6	14.62	97																				4.20735	5.58274	4.67442	2.0162	4.16246
Ethylbenzene	乙苯	100-41-4	16.825	87																								4.59342				4.05609
Benzene, 1,4-dichloro-	1,4-二氯苯	106-46-7	27.849	97
p-Xylene	对二甲苯	106-42-3	14.384	97																				5.21819	6.80906								5.15926
Benzene, 1,3-dimethyl-	1,3-二甲基苯	108-38-3	16.83	86
Toluene	甲苯	108-88-3	11.156	98	20.9882																				20.9882							5.85174
Benzene, 1-(1,5-dimethyl-4-hexenyl)-4-methyl-	1-（1,5-二甲基-4-己烯基）-4-甲基苯	644-30-4	37.07	92																	5.79418	12.2121					2.10715						3.65692	3.33284		14.9575		56.3531
Cyclopropane, 1,1,2,2-tetramethyl-3-(2-phenylethenylideno)-	1,1,2,2-四甲基-3-（2-苯基乙烯基）环丙烷	0-0-0	42.635	73
				总数	20.9882			0			0			0			0			18.0063				55.2861			12.8792			12.0358			12.149			71.3106
				单列总数	20.9882	0	0	0	0	0	0	0	0	0	0	0	0	0	0	0	5.79418	12.2121	0	12.4191	36.3321	6.53486	4.12335	8.75588	0	0	0	12.0358	8.81619	3.33284	0	14.9575	0	56.3531
Ethers
(Z)-4-Decen-1-ol, methyl ether	（Z）-4-癸烯-1-醇，甲醚	0-0-0	28.331	84	8.09728	9.03639	9.02981	7.35971	7.14227	7.52668	11.3944	8.64779	8.14854		8.49697	9.87482								7.48537	7.62724	8.23039	11.2092	10.2637	9.52405	10.1682	13.5817	11.9815
Heptyl hexadecyl ether	庚基十六烷基醚	0-0-0	36.649	78	6.90848
Dodecyl propyl ether	十二烷基丙醚	0-0-0	35.565	76
(2-Methylphenyl) methanol, ethyl ether	（2-甲基苯基）甲醇乙醚	0-0-0	38.245	77																																		40.8562
3.beta.-Methyl-trans-hexahydrophthalide	3.beta.-甲基-反式六氢邻苯二甲醚	42412-71-5	30.418	76																												3.71832
2,4,6,8,9,10-Hexaaza-1,3,5,7-tetraphosphatricyclo[3.3.1.1(3,7)]decane, 2,4,6,8,9,10-hexamethyl-, 1-sulfide	2,4,6,8,9,10-六氮杂-1,3,5,7-四磷杂三环[3.3.1.1（3,7）]癸烷，2,4,6,8,9,10-六甲基-1-硫醚	38448-57-6	4.563	28																												1.04506
				总数	33.072			22.0287			28.1908			18.3718			0			0				23.343			30.9969			40.4949			0			40.8562
				单列总数	15.0058	9.03639	9.02981	7.35971	7.14227	7.52668	11.3944	8.64779	8.14854	0	8.49697	9.87482	0	0	0	0	0	0	0	7.48537	7.62724	8.23039	11.2092	10.2637	9.52405	10.1682	13.5817	16.7449	0	0	0	0	0	40.8562
Others
Trichloromethane	67-66-3	10.393	97																											20.5407
Nortriptyline	72-69-5	4.004	52																												7.97622
Aluminum, triethyl-	97-93-8	41.426	90																				4.31673	1.94778	2.90412					2.69044
Benzyl chloride	100-44-7	30.315	80																											1.35754
Formamide, N,N-dibutyl-	761-65-9	37.145	82																											1.38641
Naphthalene, decahydro-2-methyl-	2958-76-1	30.01	84																													5.62709	5.78336	8.17367
1-Nonyne	567104+3452/9/3	28.349	81																													18.4926	18.338	16.888
D-Mannoheptulose	3615-44-9	38.799	75																																18.2056	40.5981
Furan, 2-pentyl-	3777-69-3	18.385	95																				1.93863	2.91531
1-Isopropyl-4,7-dimethyl-1,2,3,5,6,8a-hexahydronaphthalene	16729-1-4	35.545	83																												3.04913	1.40499	1.40636	1.12857
Cyclohexaneethanol, acetate	21722-83-8	30.47	89													28.6561	30.4261	35.7351	15.0106	24.2497	25.7178
Dodecanamide, N-decyl-	22205-13-6	7.455	33																												1.23326
.alpha.-Muurolene	31983-22-9	34.425	80																												3.03604
Vitexifolin E	351427-22-0	4.17	35																												1.43468
1-Norbornanemethanol, acetate	91057-8-8	33.982	85																		9.60047														32.5144	36.8702	28.2678
4-Hexen-1-ol, acetate	72237-36-6	23.405	87										2.60246	1.39852		15.8231	8.97471			12.4225	11.1244											11.1158	5.45579	3.61183	24.9429	34.3042
3.beta.-Methyl-trans-hexahydrophthalide	42412-71-5	30.418	76																												3.71832
1-Undecene	821-95-4	23.262	90																							26.8017	16.5273				43.8279
1,4-Hexadiene, 4-methyl-	1116-90-1	26.533	90	5.68186		1.70281	11.9099			8.52967	11.5858	4.39965													6.50079				8.8262
1,6-Heptadiene, 2,5,5-trimethyl-	62238-28-2	26.395	89																																		8.07085
Aluminum, triethyl-	97-93-8	41.426	90																				4.31673	1.94778	2.90412					2.69044
1-Nonyne	567104+3452/9/3	28.349	81																													18.4926	18.338	16.888
2-[(Trimethylsilyl)oxy]-2-{4-[(trimethylsilyl)oxy]phenyl}ethanamine	0-0-0	15.958	80																				79.5874	93.0686	61.7802		49.3644	61.6681	65.0205	20.4427	18.976	21.4511	34.9035		37.1829	36.3057
Oxime-, methoxy-phenyl-_	0-0-0	36.607	80	56.2604																			58.5751	56.2604
Pyrrolidine-2-carboxamide, 1-benzyloxycarbonyl-N-(4-tolyl)-	0-0-0	17.011	79																								14.4504
6-(2,3-Difluorophenyl)-3-(thiophen-3-yl)-[1,2,4]triazolo[3,4-b][1,3,4]thiadiazole	0-0-0	52.076	34																												2.42362
2-(Hydroxymethyl)-2-methyl-4-phenyl-4a,10a-dihydro-2H,5H-pyrano[2,3-b]chromen-5-one #	0-0-0	49.605	34																												2.41766
Benzenesulfonamide, 2,4-dichloro-3-methyl-	0-0-0	2.68	28																												1.13605
Vanillin, TBDMS derivative	0-0-0	29.675	71																												8.88454
7-epi-cis-sesquisabinene hydrate	0-0-0	36.759	73																												3.44471					11.5602
Neoclovene oxide	0-0-0	38.545	32																												3.3961
Pyrazole, 4,5-dihydro-1-benzyl-3-(2-furyl)-	0-0-0	9.575	42																												3.35359
Methyl 3,4-di-O-acetyl-2,6,7-tri-O-methyl-.alpha.-l-glycero-d-mannoheptopyranoside	0-0-0	49.844	32																												1.91891
3-Furancarboxamide, N,N,2-triethyltetrahydro-2-methyl-5-oxo-	0-0-0	4.454	25																												1.7928
1,3-Di-O-acetyl-.alpha.-.beta.-d-ribopyranose	0-0-0	7.25	60																												1.74277
Ethyl 1-thio-.alpha.-d-arabinofuranoside	0-0-0	7.405	32																												1.29327
2-Chloro-8-methoxy-N,N-dimethyl-5-nitroquinolin-4-amine	0-0-0	52.215	28																												1.21136
			总数	63.6451			11.9099			24.5151			4.00098			119.615			98.1255				378.964			168.812			239.222			207.499			308.823
			单列总数	61.9423	0	1.70281	11.9099	0	0	8.52967	11.5858	4.39965	2.60246	1.39852	0	44.4792	39.4008	35.7351	15.0106	36.6722	46.4427	0	148.735	156.14	74.0893	26.8017	80.3422	61.6681	73.8467	49.1082	116.267	76.5843	84.225	46.6901	112.846	159.638	36.3387
